# Supplementary material for: Hierarchical yolk–shell layered potassium niobate for tuned pH-dependent photocatalytic H2evolution
Source: Royal Society of Chemistry journal article supplement (doi:10.1039/c6cy02640k), 2017-01-01
Supplement: c6cy02640k1.pdf [file c6cy02640k1.pdf]

## Electronic Supplementary Information

### Hierarchical Yolk–shell Layered Potassium Niobate for Tuned pH-Dependent Photocatalytic H<sub>2</sub> Evolutions

Bo Liang,<sup>a</sup> Ning Zhang,<sup>\*, a, b</sup> Chen Chen,<sup>a</sup> Xiaohe Liu,<sup>a</sup> Renzhi Ma,<sup>a</sup> Shengfu Tong,<sup>c</sup> Zongwei Mei,<sup>d</sup> Vellaisamy A. L. Roy,<sup>\*, b</sup> Haiyan Wang,<sup>e</sup> Yougen Tang<sup>e</sup>

<sup>a</sup> School of Materials Science and Engineering, Central South University, Changsha, Hunan 410083, China      Email: nzhang@csu.edu.cn

<sup>b</sup> Department of Physics and Materials Science, City University of Hong Kong, Tat Chee Avenue, Kowloon, Hong Kong SAR, China      Email: val.roy@cityu.edu.hk

<sup>c</sup> School of Chemistry, Sun Yat–sen University, Guangzhou 510275, China

<sup>d</sup> School of Advanced Materials, Peking University Shenzhen Graduate School, University Town, Shenzhen, Guangdong 518055, China

<sup>e</sup> College of Chemistry and Chemical Engineering, Central South University, Changsha, Hunan 410083, China

## Additional Figures and Captions

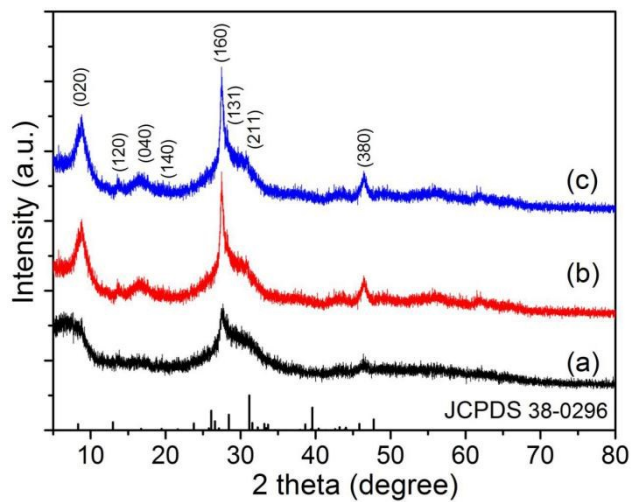

**Fig. S1** XRD profiles of as prepared materials at reaction time for (a) 2h, (b) 6 h, and (c) 12 h.

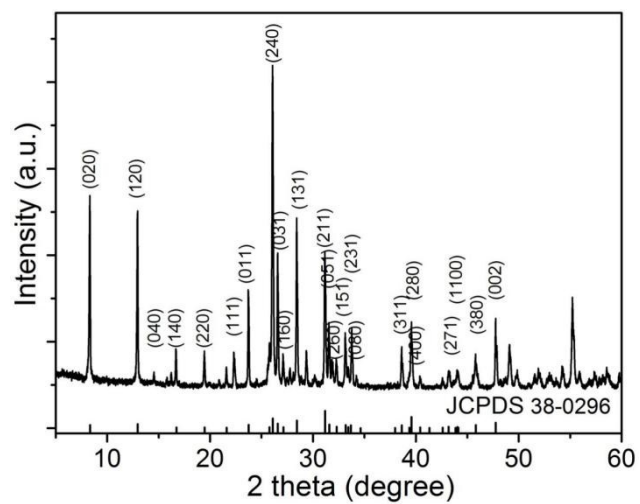

**Fig. S2** XRD profile of bulk  $\text{KNb}_3\text{O}_8$  prepared by SSR method.

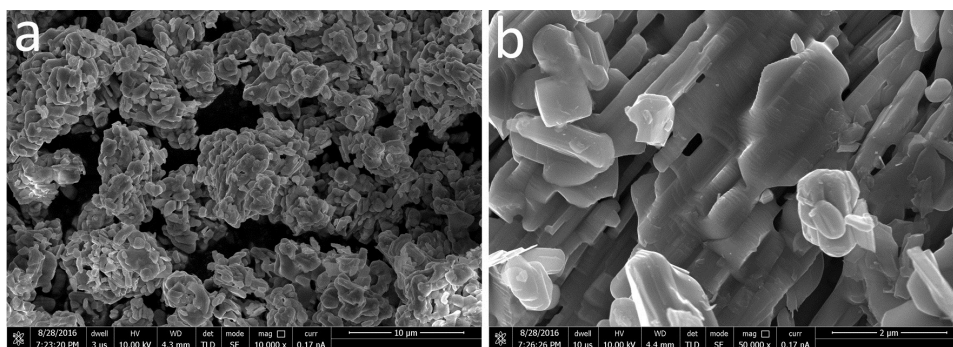

**Fig. S3** (a, b) SEM images of bulk  $\text{KNb}_3\text{O}_8$  prepared by SSR method.

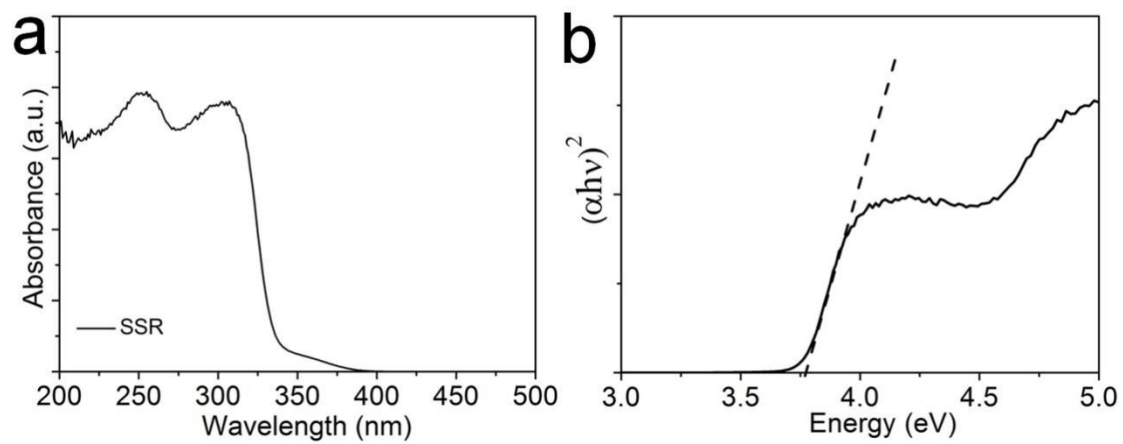

**Fig. S4** (a) UV-visible diffuse reflectance spectra for bulk  $\text{KNb}_3\text{O}_8$  prepared by SSR method; (b) the calculation diagram of its bandgap.

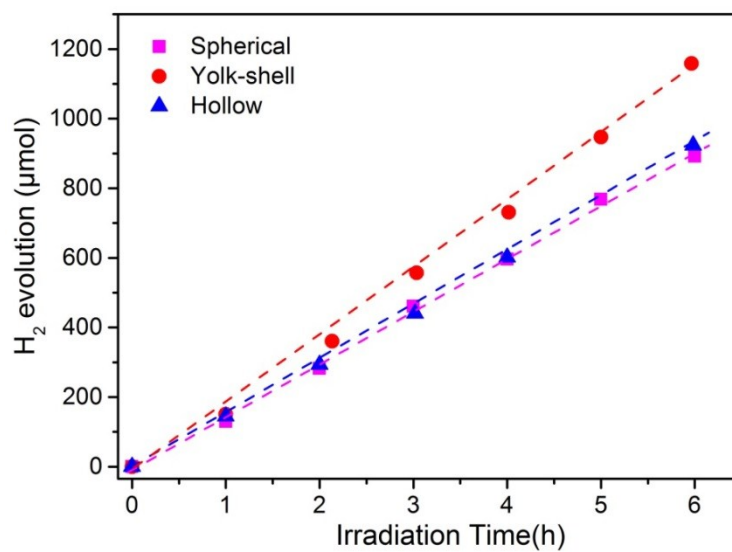

**Fig. S5** H<sub>2</sub> evolution respect to time over spherical, yolk-shell, and hollow structures of KNb<sub>3</sub>O<sub>8</sub> with loading 1 wt. % Pt.

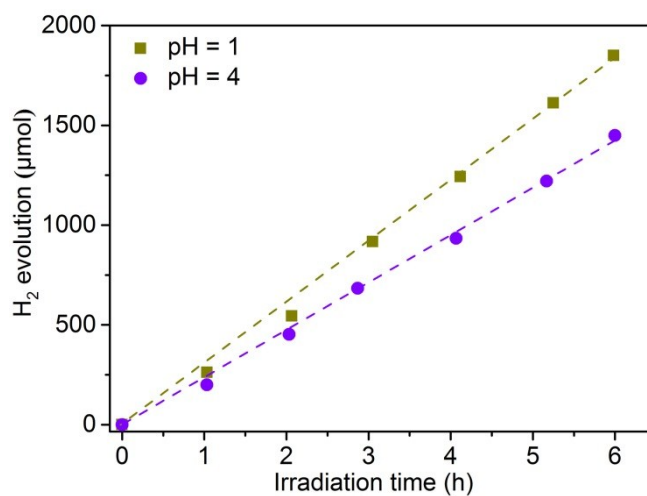

**Fig. S6** H<sub>2</sub> evolutions over yolk-shell KNb<sub>3</sub>O<sub>8</sub> with loading 1 wt. % Pt at pH 1 and 4.

The H<sub>2</sub> evolution rates are 243 and 317 mmol h<sup>-1</sup> in the pH of 4 and 1 respectively, which are higher than the evolution rate in pH of 7. Thus, the evolution rates are also increased with decreasing pH. Such results suggest that the higher concentration of H<sup>+</sup> are beneficial to the photocatalytic H<sub>2</sub> evolutions in acid condition. Furthermore, KNb<sub>3</sub>O<sub>8</sub> are completely transformed in to HNb<sub>3</sub>O<sub>8</sub> because of ions exchange between H<sup>+</sup> and K<sup>+</sup> in acid condition, which also in some extent beneficial the H<sub>2</sub> evolutions.

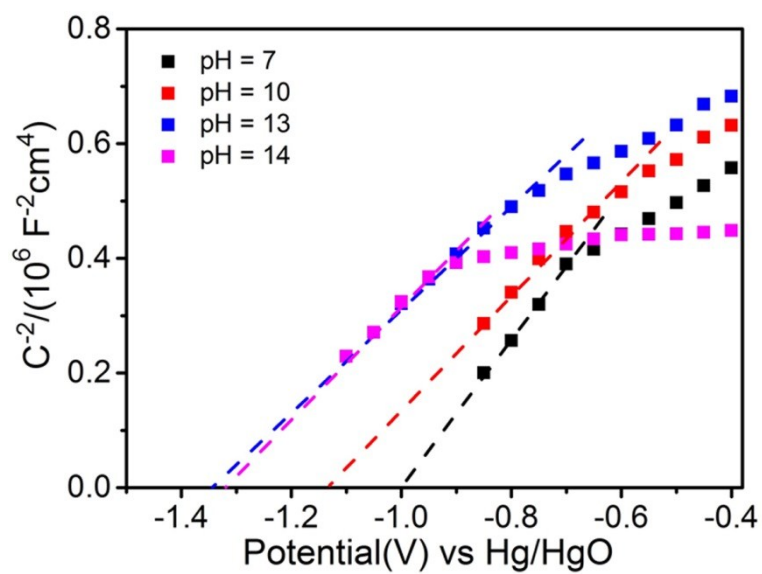

**Fig. S7** Mott-Schottky plots of the bulk KNb<sub>3</sub>O<sub>8</sub> at various pH values. All samples are loaded with 1 wt. % Pt.
